# Supplementary material for: Neuroinflammation and Neuronal Loss in the Hippocampus Are Associated with Immediate Posttraumatic Seizures and Corticosterone Elevation in Rats
Source: MDPI journal article supplement (doi:10.3390/ijms22115883), 2021-05-30
Supplement: s1 [file s1]

## Supplementary Materials

A

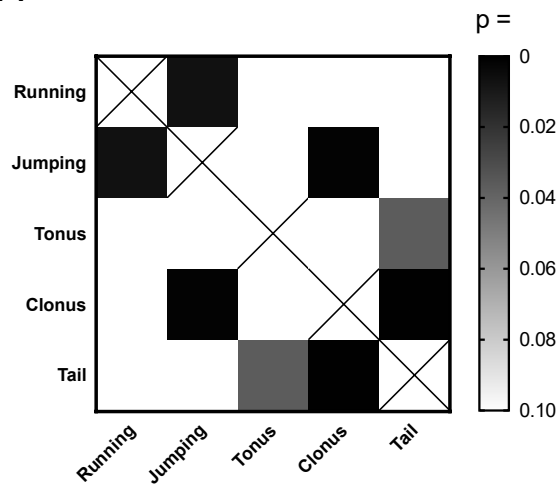

B

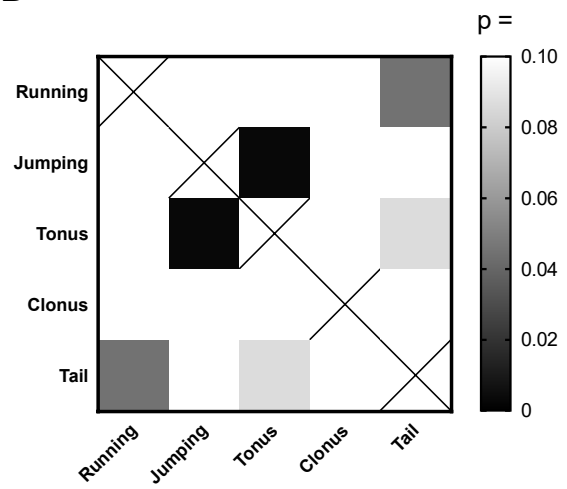

**Figure S1.** Correlations of immediate seizure episode elements. A – Correlations of immediate seizures elements duration. Duration of jumping correlated with duration of running and clonus. Duration of tail wriggling correlated with tonus and clonus. B – Representation of seizure episode elements (Fischer exact test). In rats with jumping tonic seizures appeared more frequently.

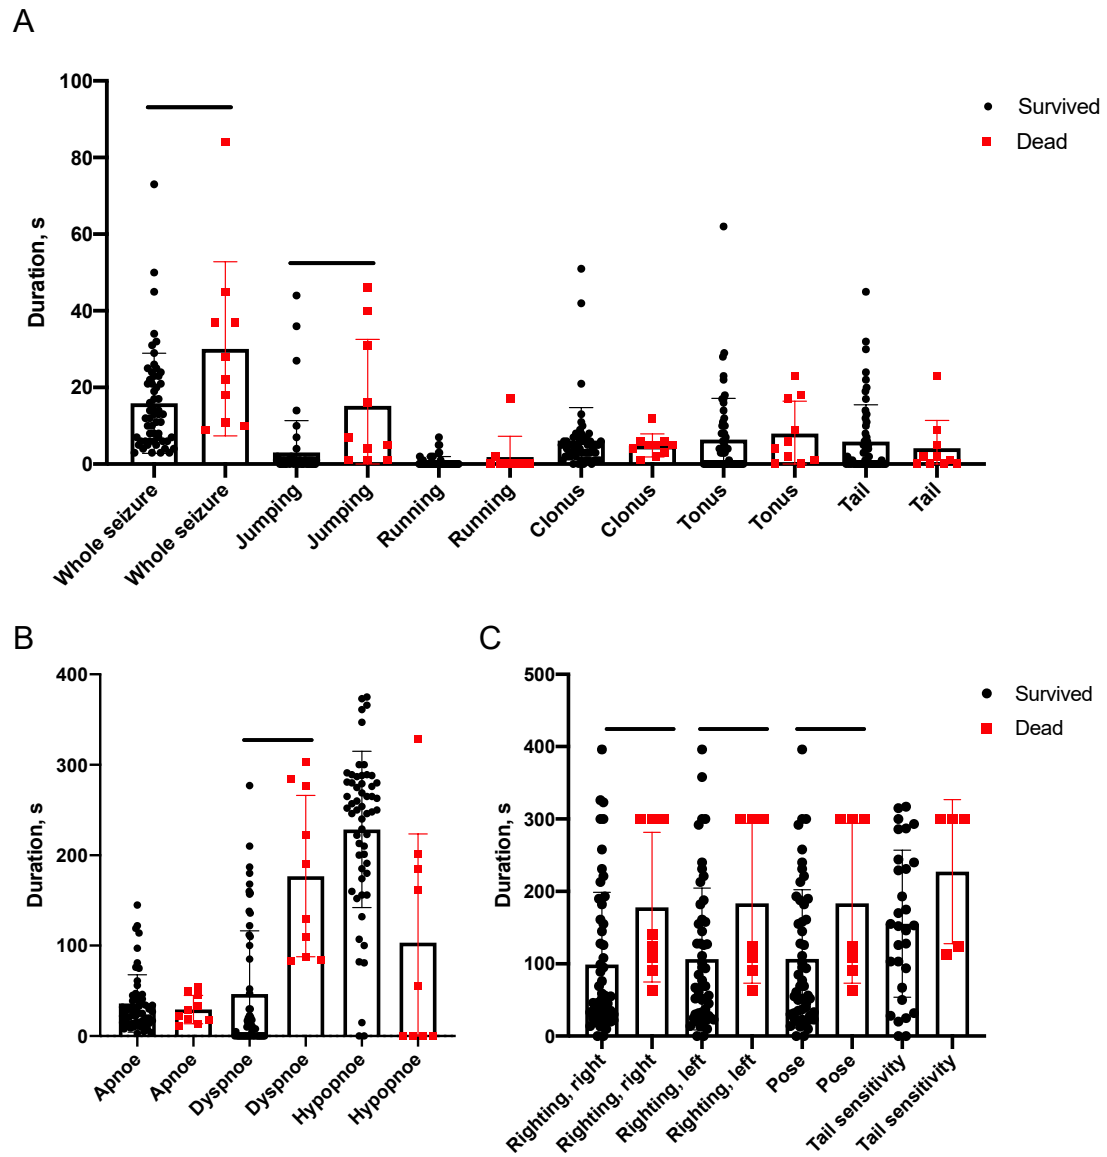

**Figure S2.** Mortality predictors. A – Longer duration of seizures and jumping was higher in animals which died. B – Dyspnoe was longer in rats which died. C – Recovery of reflexes were longer in rats which died. \* -  $p < 0.05$ , Mann-Whitney test.

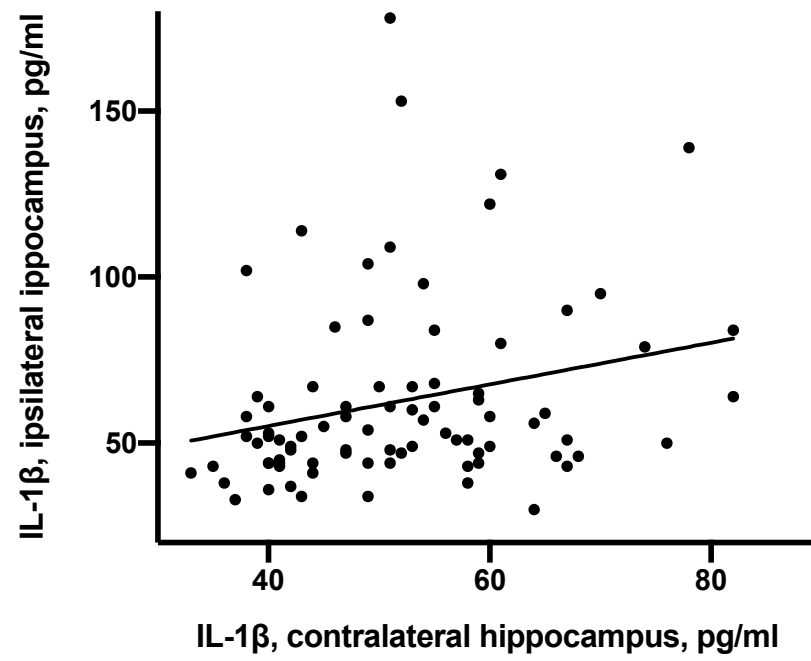

Figure S3. Correlation of IL-1 $\beta$  in the ipsilateral and contralateral hippocampus.

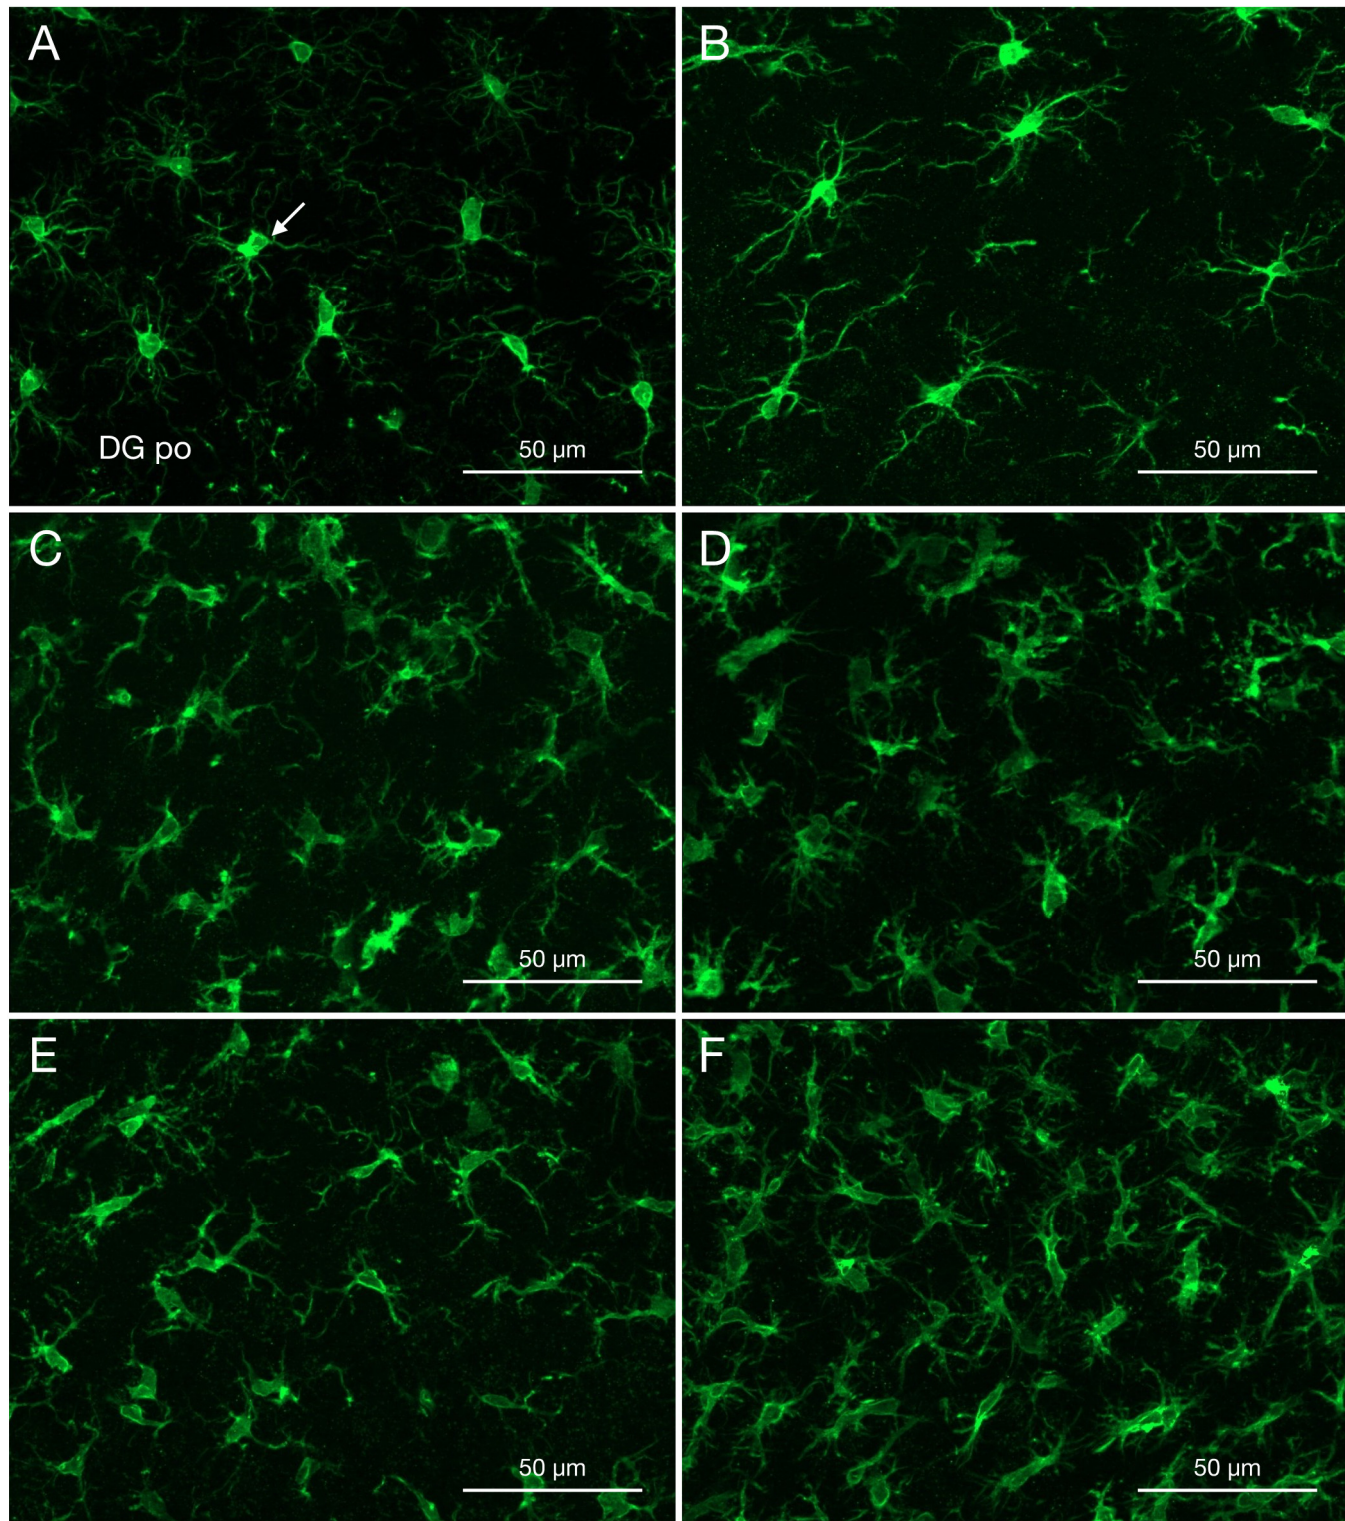

**Figure S4.** Microglial changes in the hippocampus. A – control, right hemisphere. B – Sham operated rats, day 7 after craniotomy. C, D – contralateral and ipsilateral hippocampus (bilateral changes in microglial cell morphology), day 3 after TBI. E, F - contralateral and ipsilateral hippocampus, day 7 after TBI (increasing in microglial cell density s bilaterally). Anti-Iba-1 staining. DG – dentate gyrus, po – polymorph layer. The arrow shows microglial cell.



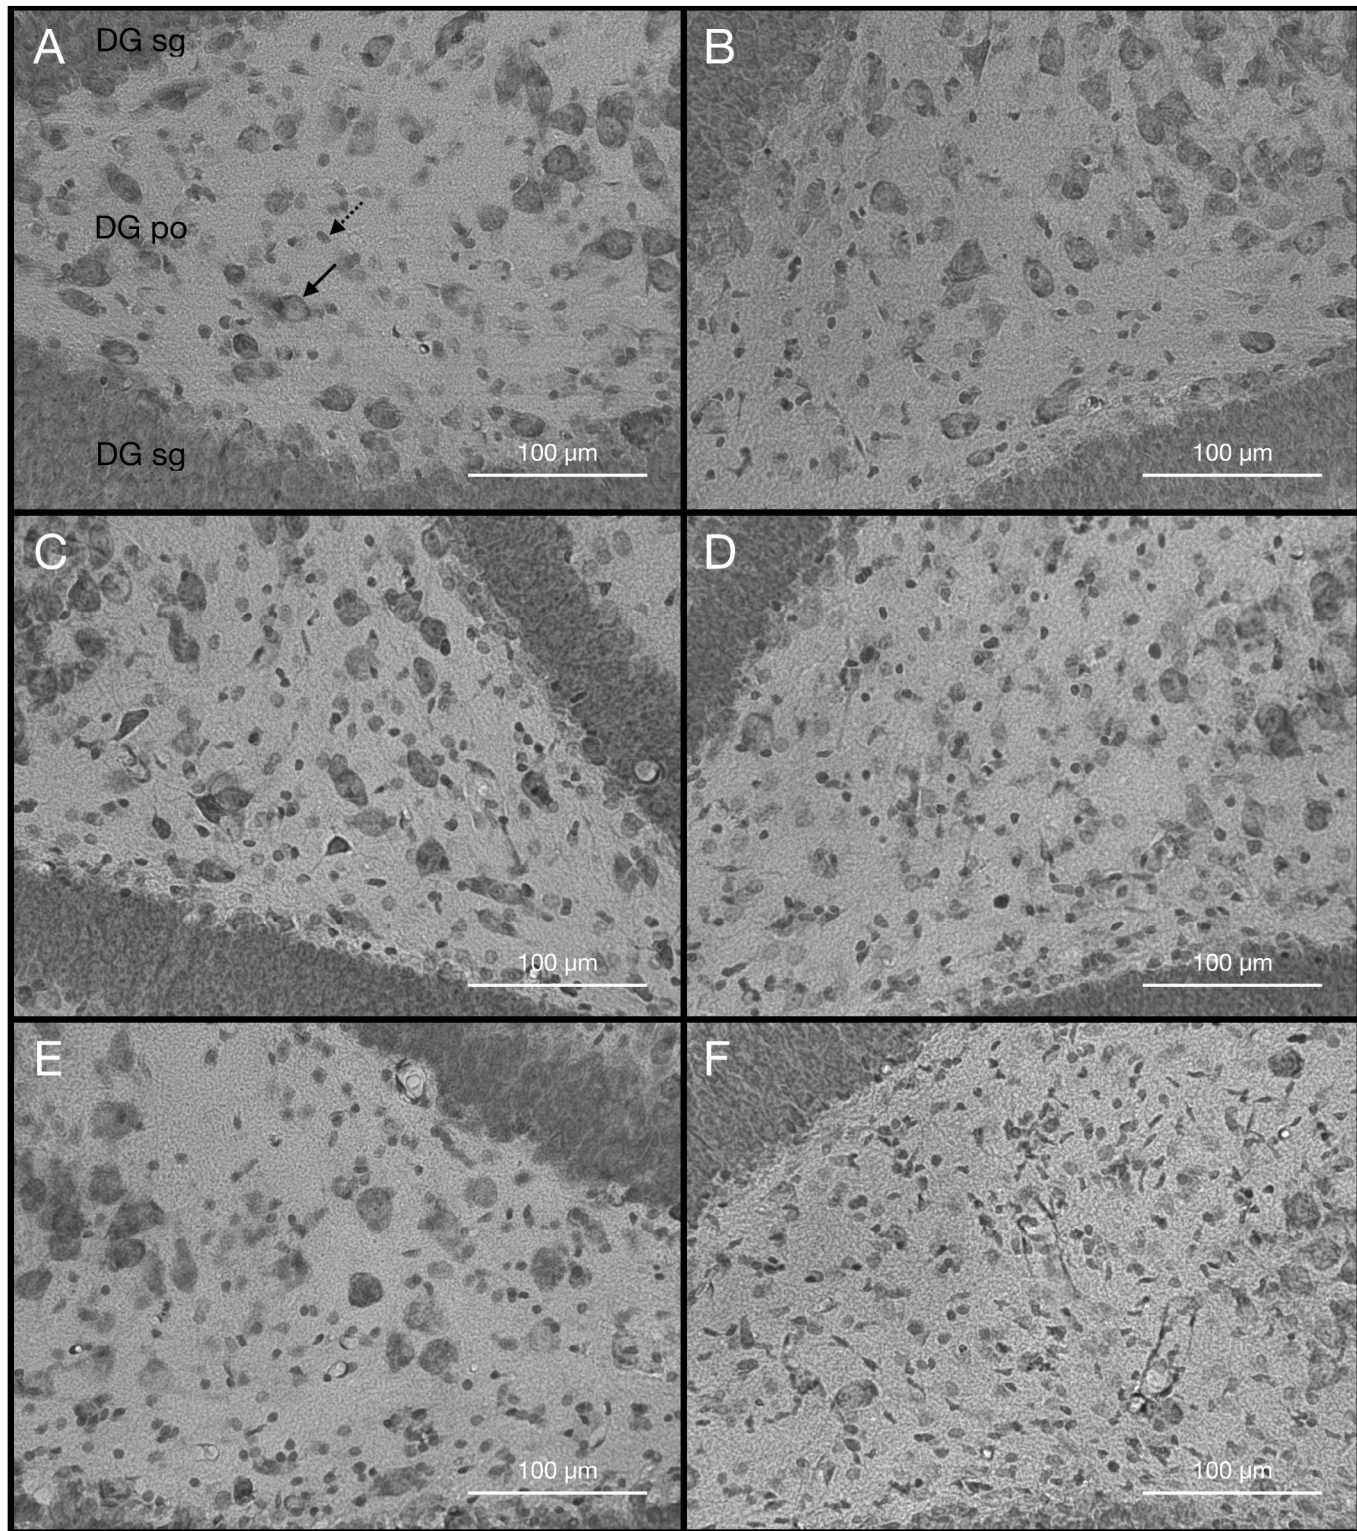

**Figure S5.** Neuronal cell loss in the hippocampus. A – control, right hemisphere. B – Sham operated rats, day 7 after craniotomy. C, D – contralateral and ipsilateral hippocampus (ipsilateral cell loss), day 3 after TBI. E, F – contralateral and ipsilateral hippocampus, day 7 after TBI (bilateral cell loss). Nissl staining. DG – dentate gyrus, sg – granular cell layer, po – polymorph layer. Solid arrow shows neurons, dotted arrow shows nucleus of glial cell.

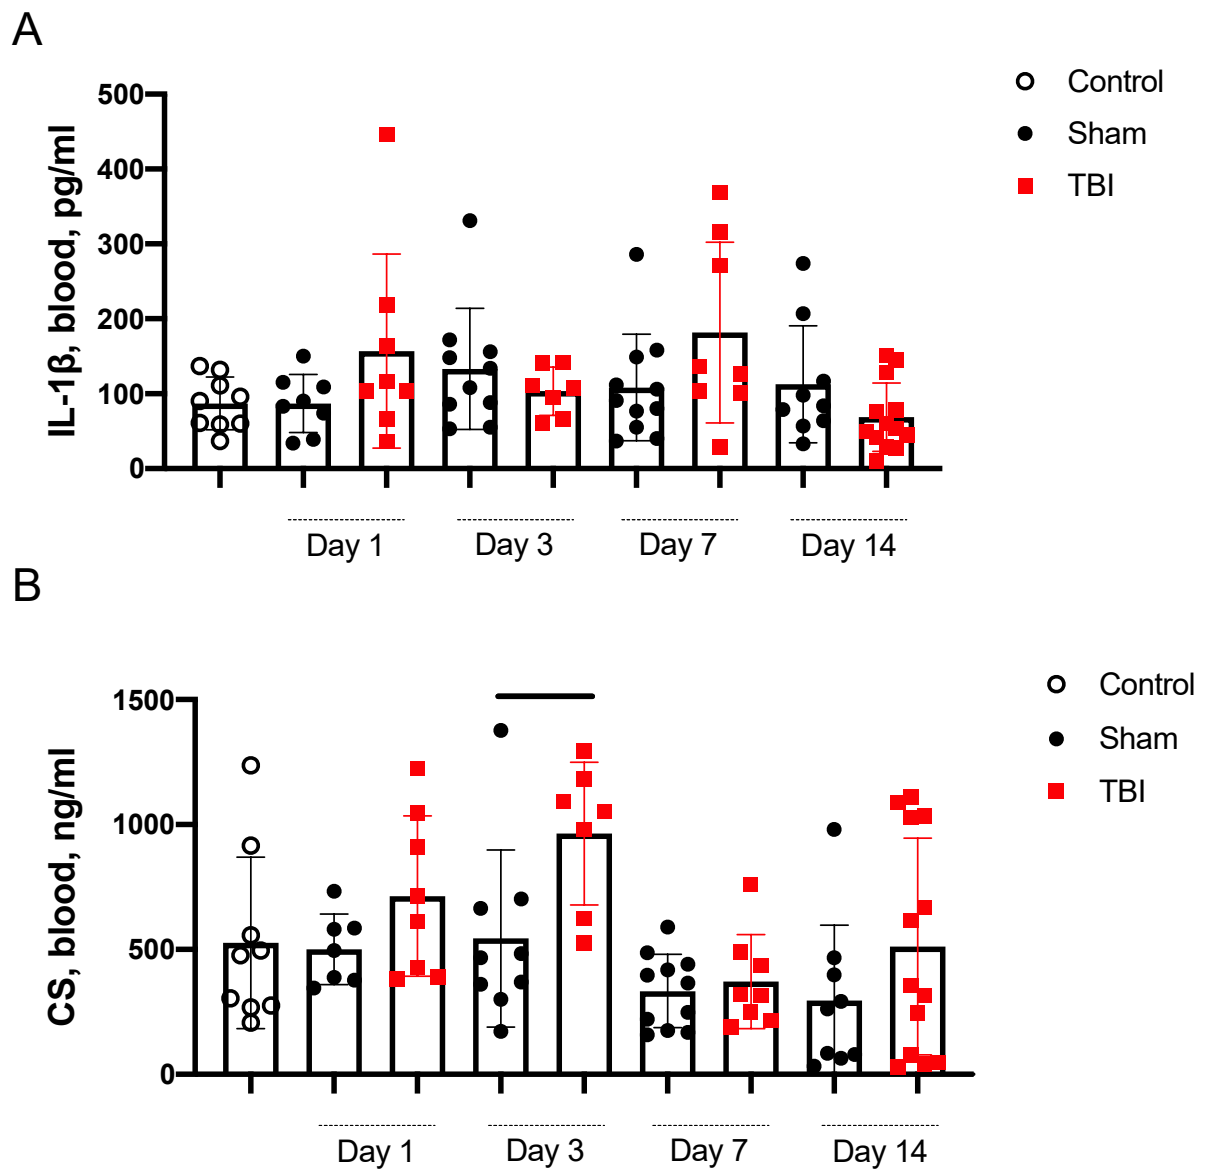

**Figure S6.** IL-1 $\beta$  and CS in blood. A – IL-1 $\beta$  in blood does not change significantly after TBI. B – CS in blood is elevated on day 3 after TBI.
